# Supplementary material for: AMOC stability amid tipping ice sheets: the crucial role of rate and noise
Source: Copernicus journal article supplement (doi:10.5194/esd-15-859-2024), 2024-07-12
Supplement: Supplementary file 1 [file esd-15-859-2024-supplement.pdf]

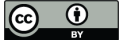

*Supplement of*

## **AMOC stability amid tipping ice sheets the crucial role of rate and noise**

**Sacha Sinet et al.**

*Correspondence to:* Sacha Sinet ([s.a.m.sinet@uu.nl](mailto:s.a.m.sinet@uu.nl))

The copyright of individual parts of the supplement might differ from the article licence.

## S1 Sensitivity of the reference AMOC ON state to WAIS meltwater fluxes

In this section, we use numerical continuation to assess the sensitivity of the AMOC box model in the reference ON state ( $F_N = F_S = 0$ ) when increasing the WAIS meltwater flux  $F_S$ . This is shown on Fig. S1, where the (stable) steady states of the AMOC model are shown in the  $(q_n, F_S)$  space. In particular, we find that the overturning strength increases by approximately 0.94 Sv when  $F_S$  increases from 0.00 to 0.06 Sv, representing an increase of  $q_n$  of about 6.65%. This can be compared to Li et al. (2023), where a freshwater flux was applied uniformly around Antarctica in the upper 200 m during 150 years, using the GISS-E2.1-G coupled climate model. There, they found that the maximum of the Atlantic overturning streamfunction at  $45^\circ\text{N}$  is increased by approximately 0.63 Sv when the freshwater flux increases by 0.06 Sv, representing an increase of about 2.84%. Hence, the sensitivity of the AMOC box model is higher but comparable to the one found in Li et al. (2023), a difference which is partly expected due to the different experimental setup.

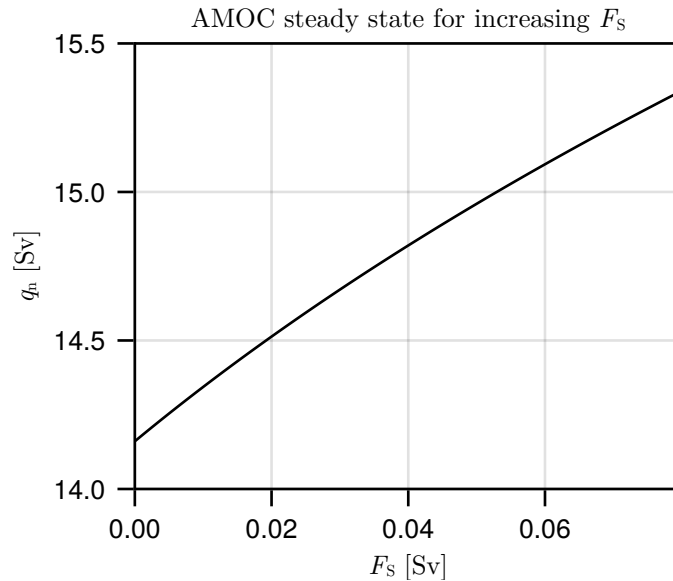

**Figure S1.** Steady states of the AMOC model in the  $(q_n, F_S)$  space, computed for  $F_N = 0$ .

## References

Li, Q., Marshall, J., Rye, C. D., Romanou, A., Rind, D., and Kelley, M.: Global Climate Impacts of Greenland and Antarctic Meltwater: A Comparative Study, *Journal of Climate*, 36, 3571–3590, <https://doi.org/10.1175/JCLI-D-22-0433.1>, publisher: American Meteorological Society Section: *Journal of Climate*, 2023.
